# Supplementary material
Source: ML conference proceedings conference paper supplement (https://openreview.net/forum?id=T5dwUK8Rc9)

# AProofBench Leaderboard

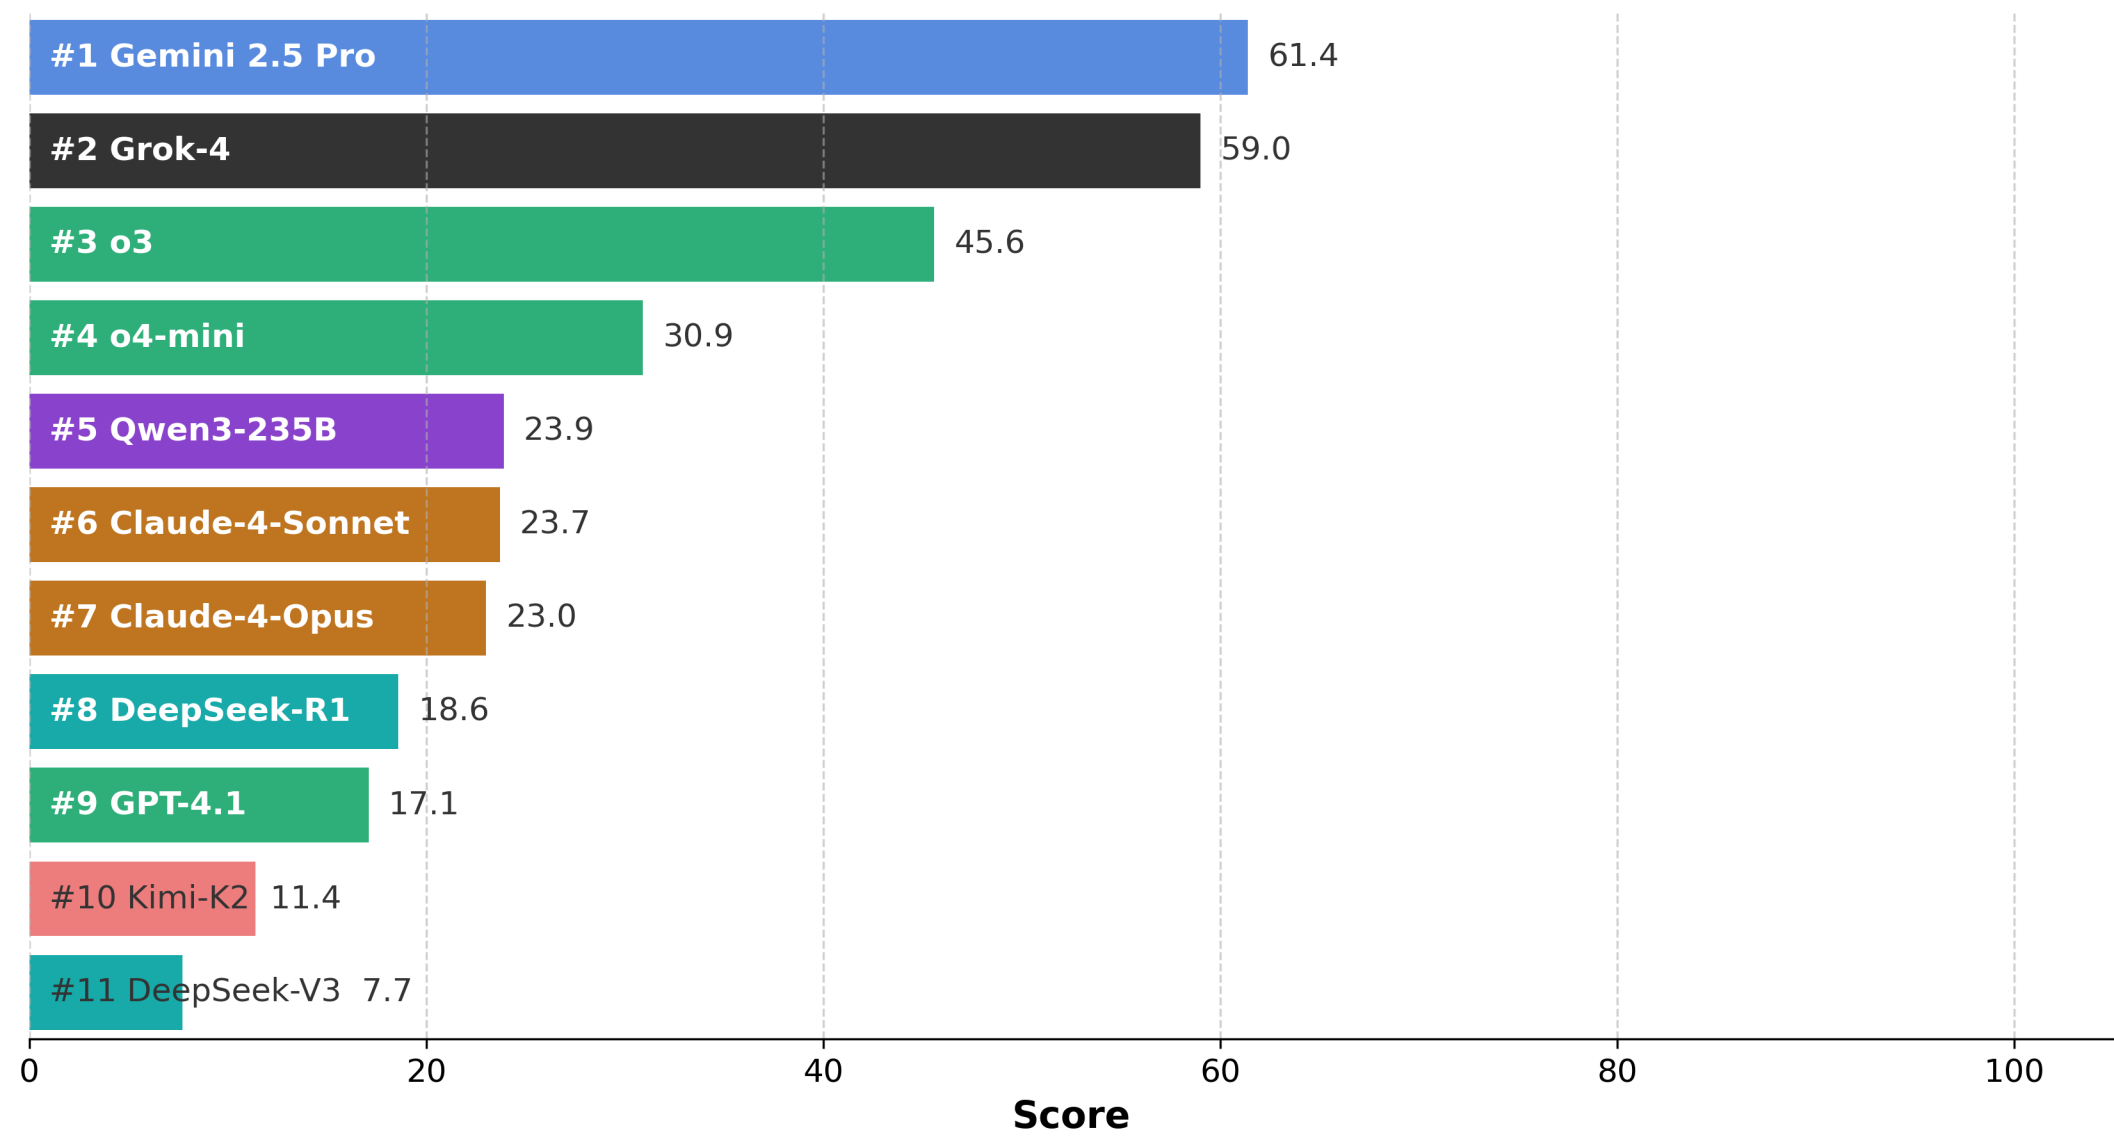

# Math-500 Leaderboard

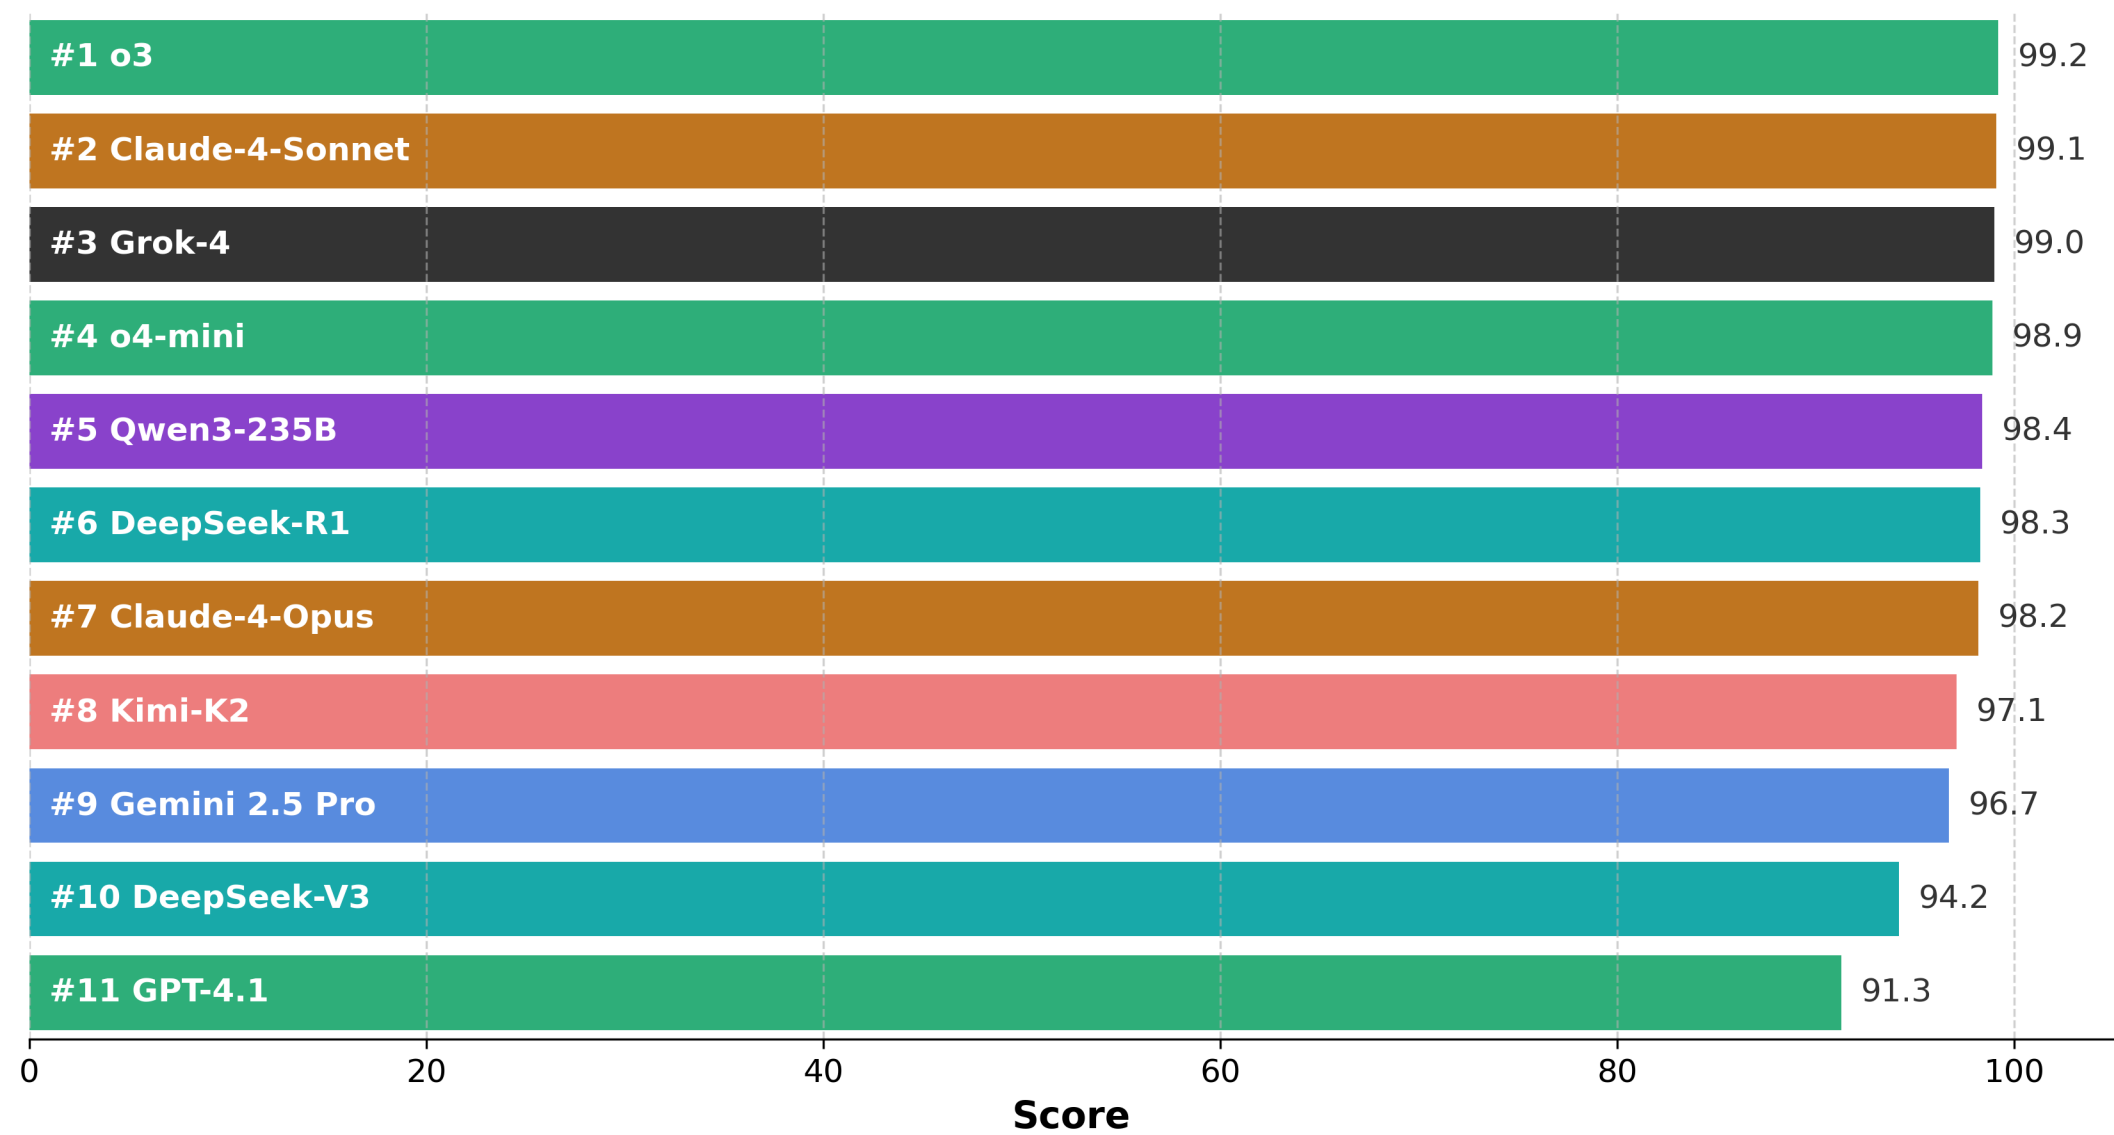

Supplement: supplementary_material [file leaderboard_comparison.pdf › Code and Data of Proof2Hybrid/figures/leaderboard_comparison.pdf]

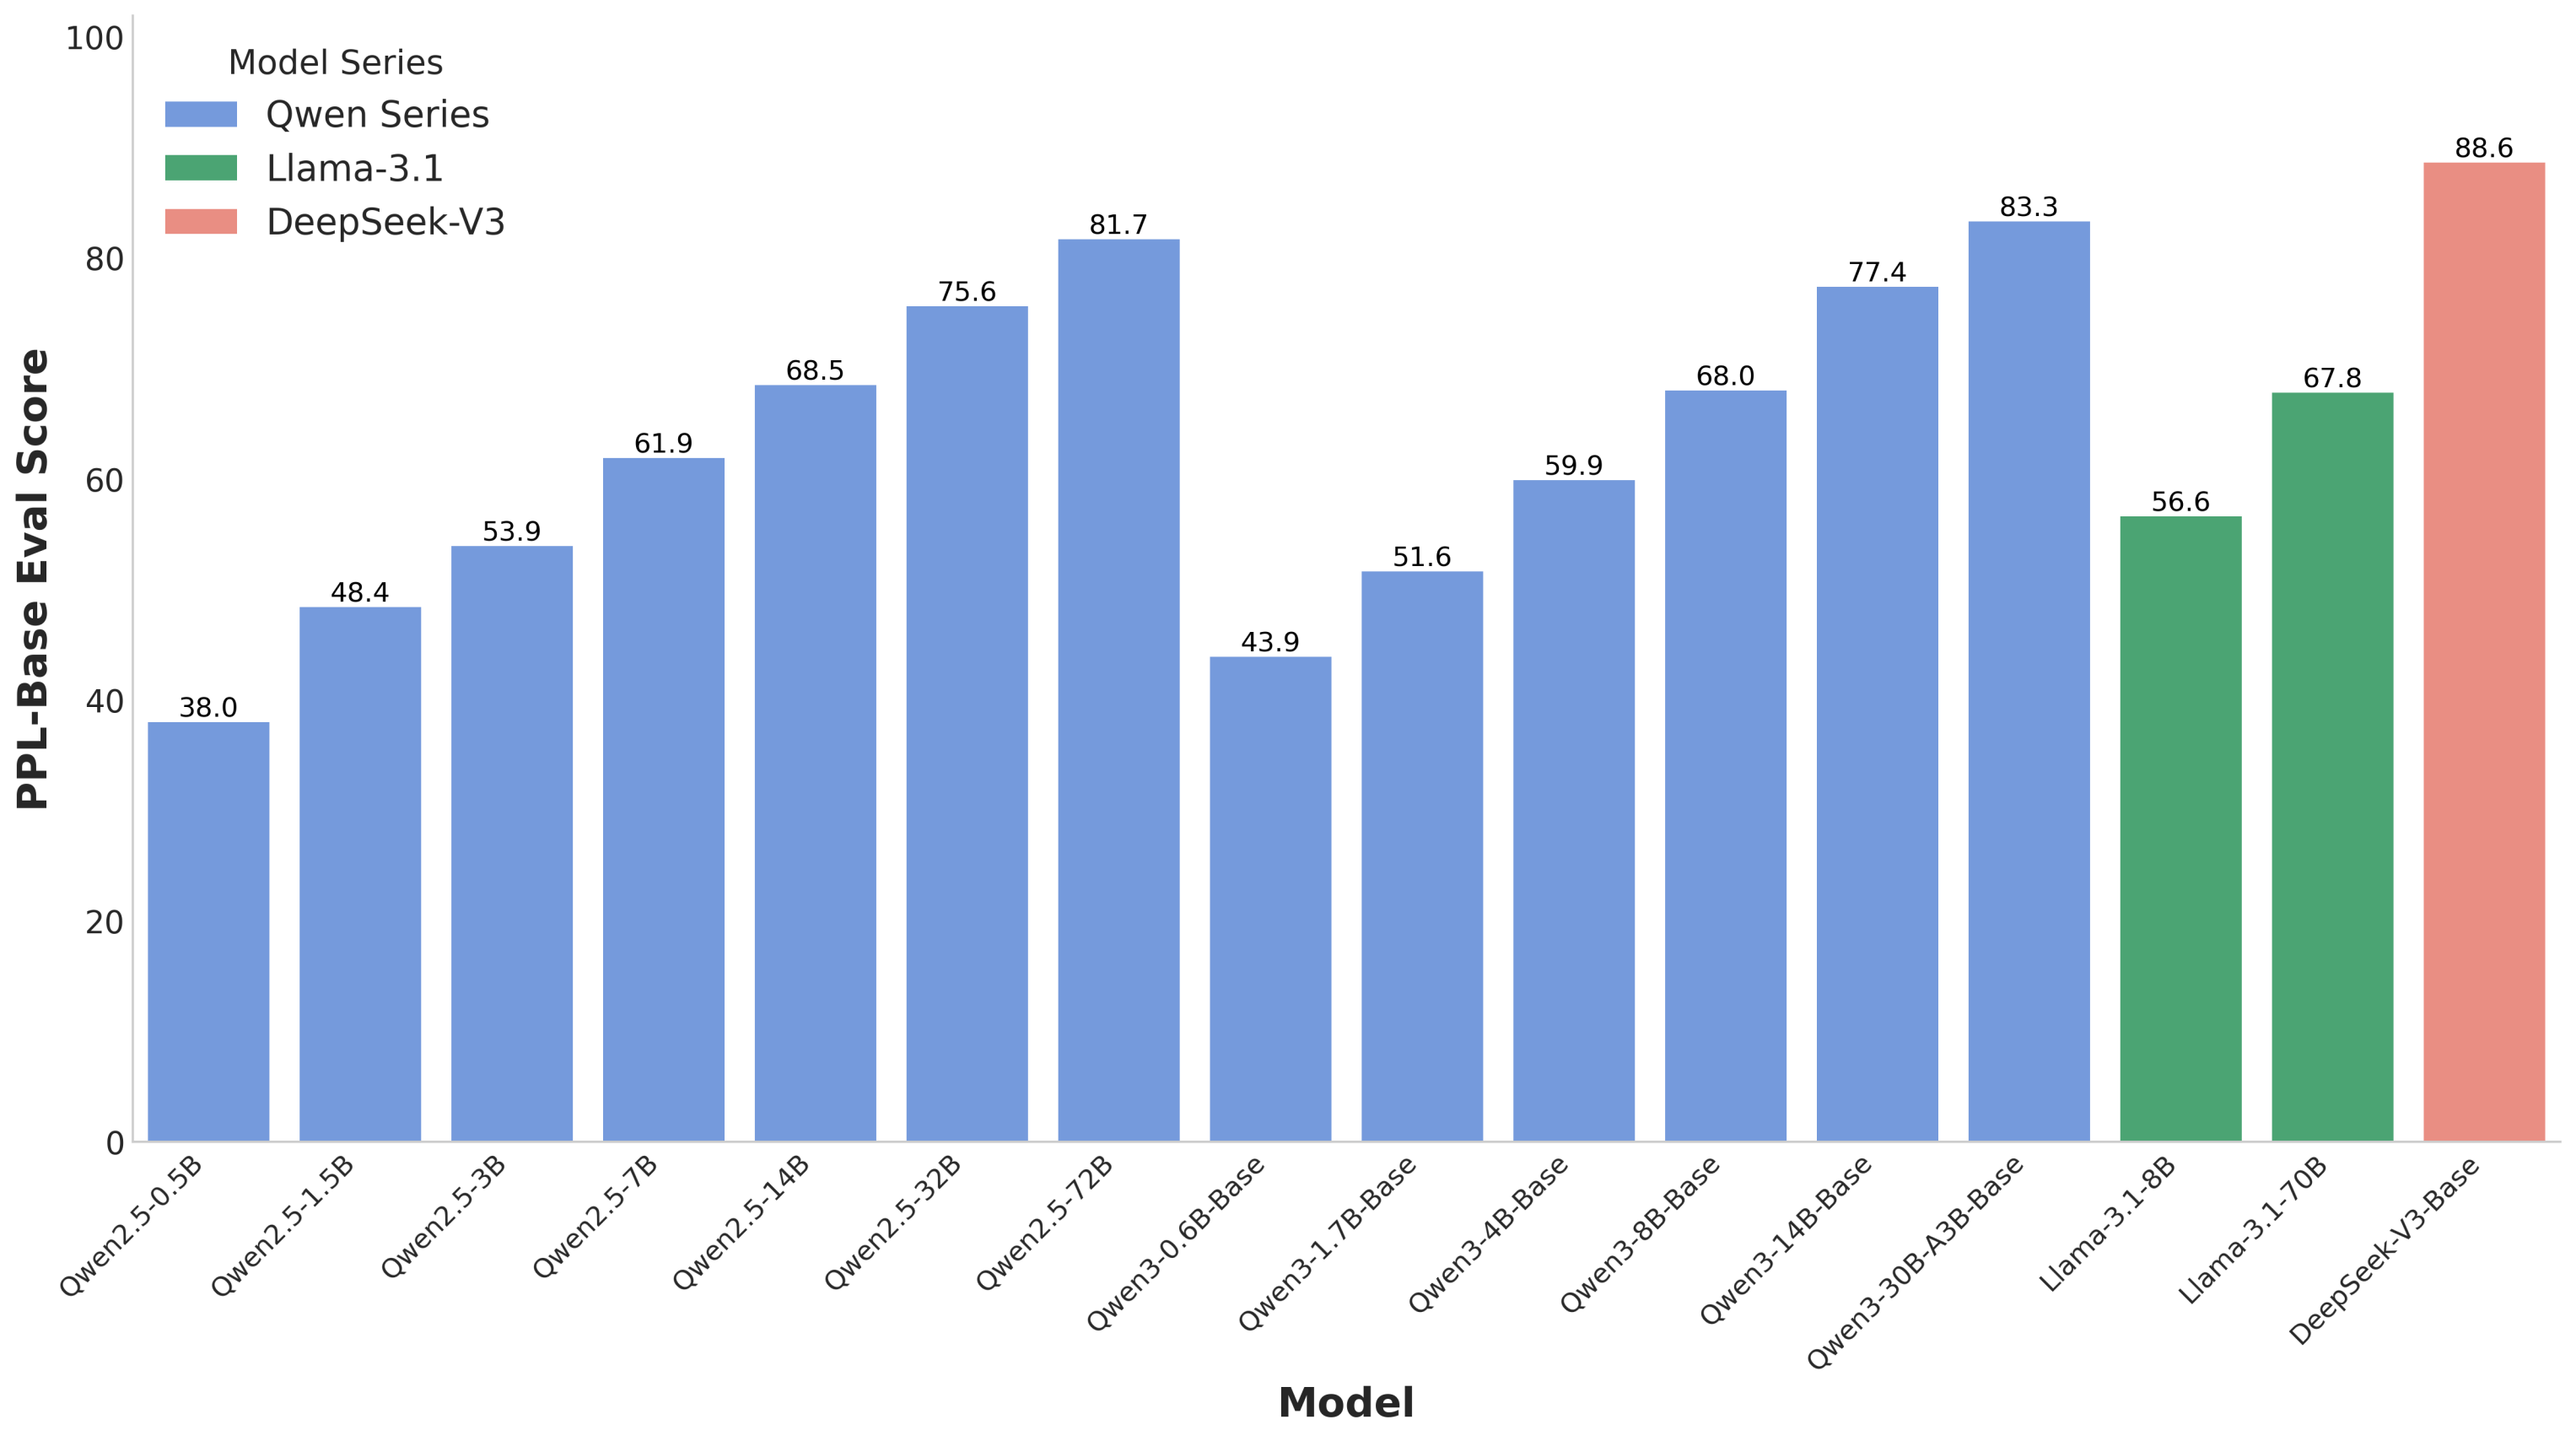

Supplement: supplementary_material [file ppl_base_eval.pdf › Code and Data of Proof2Hybrid/figures/ppl_base_eval.pdf]

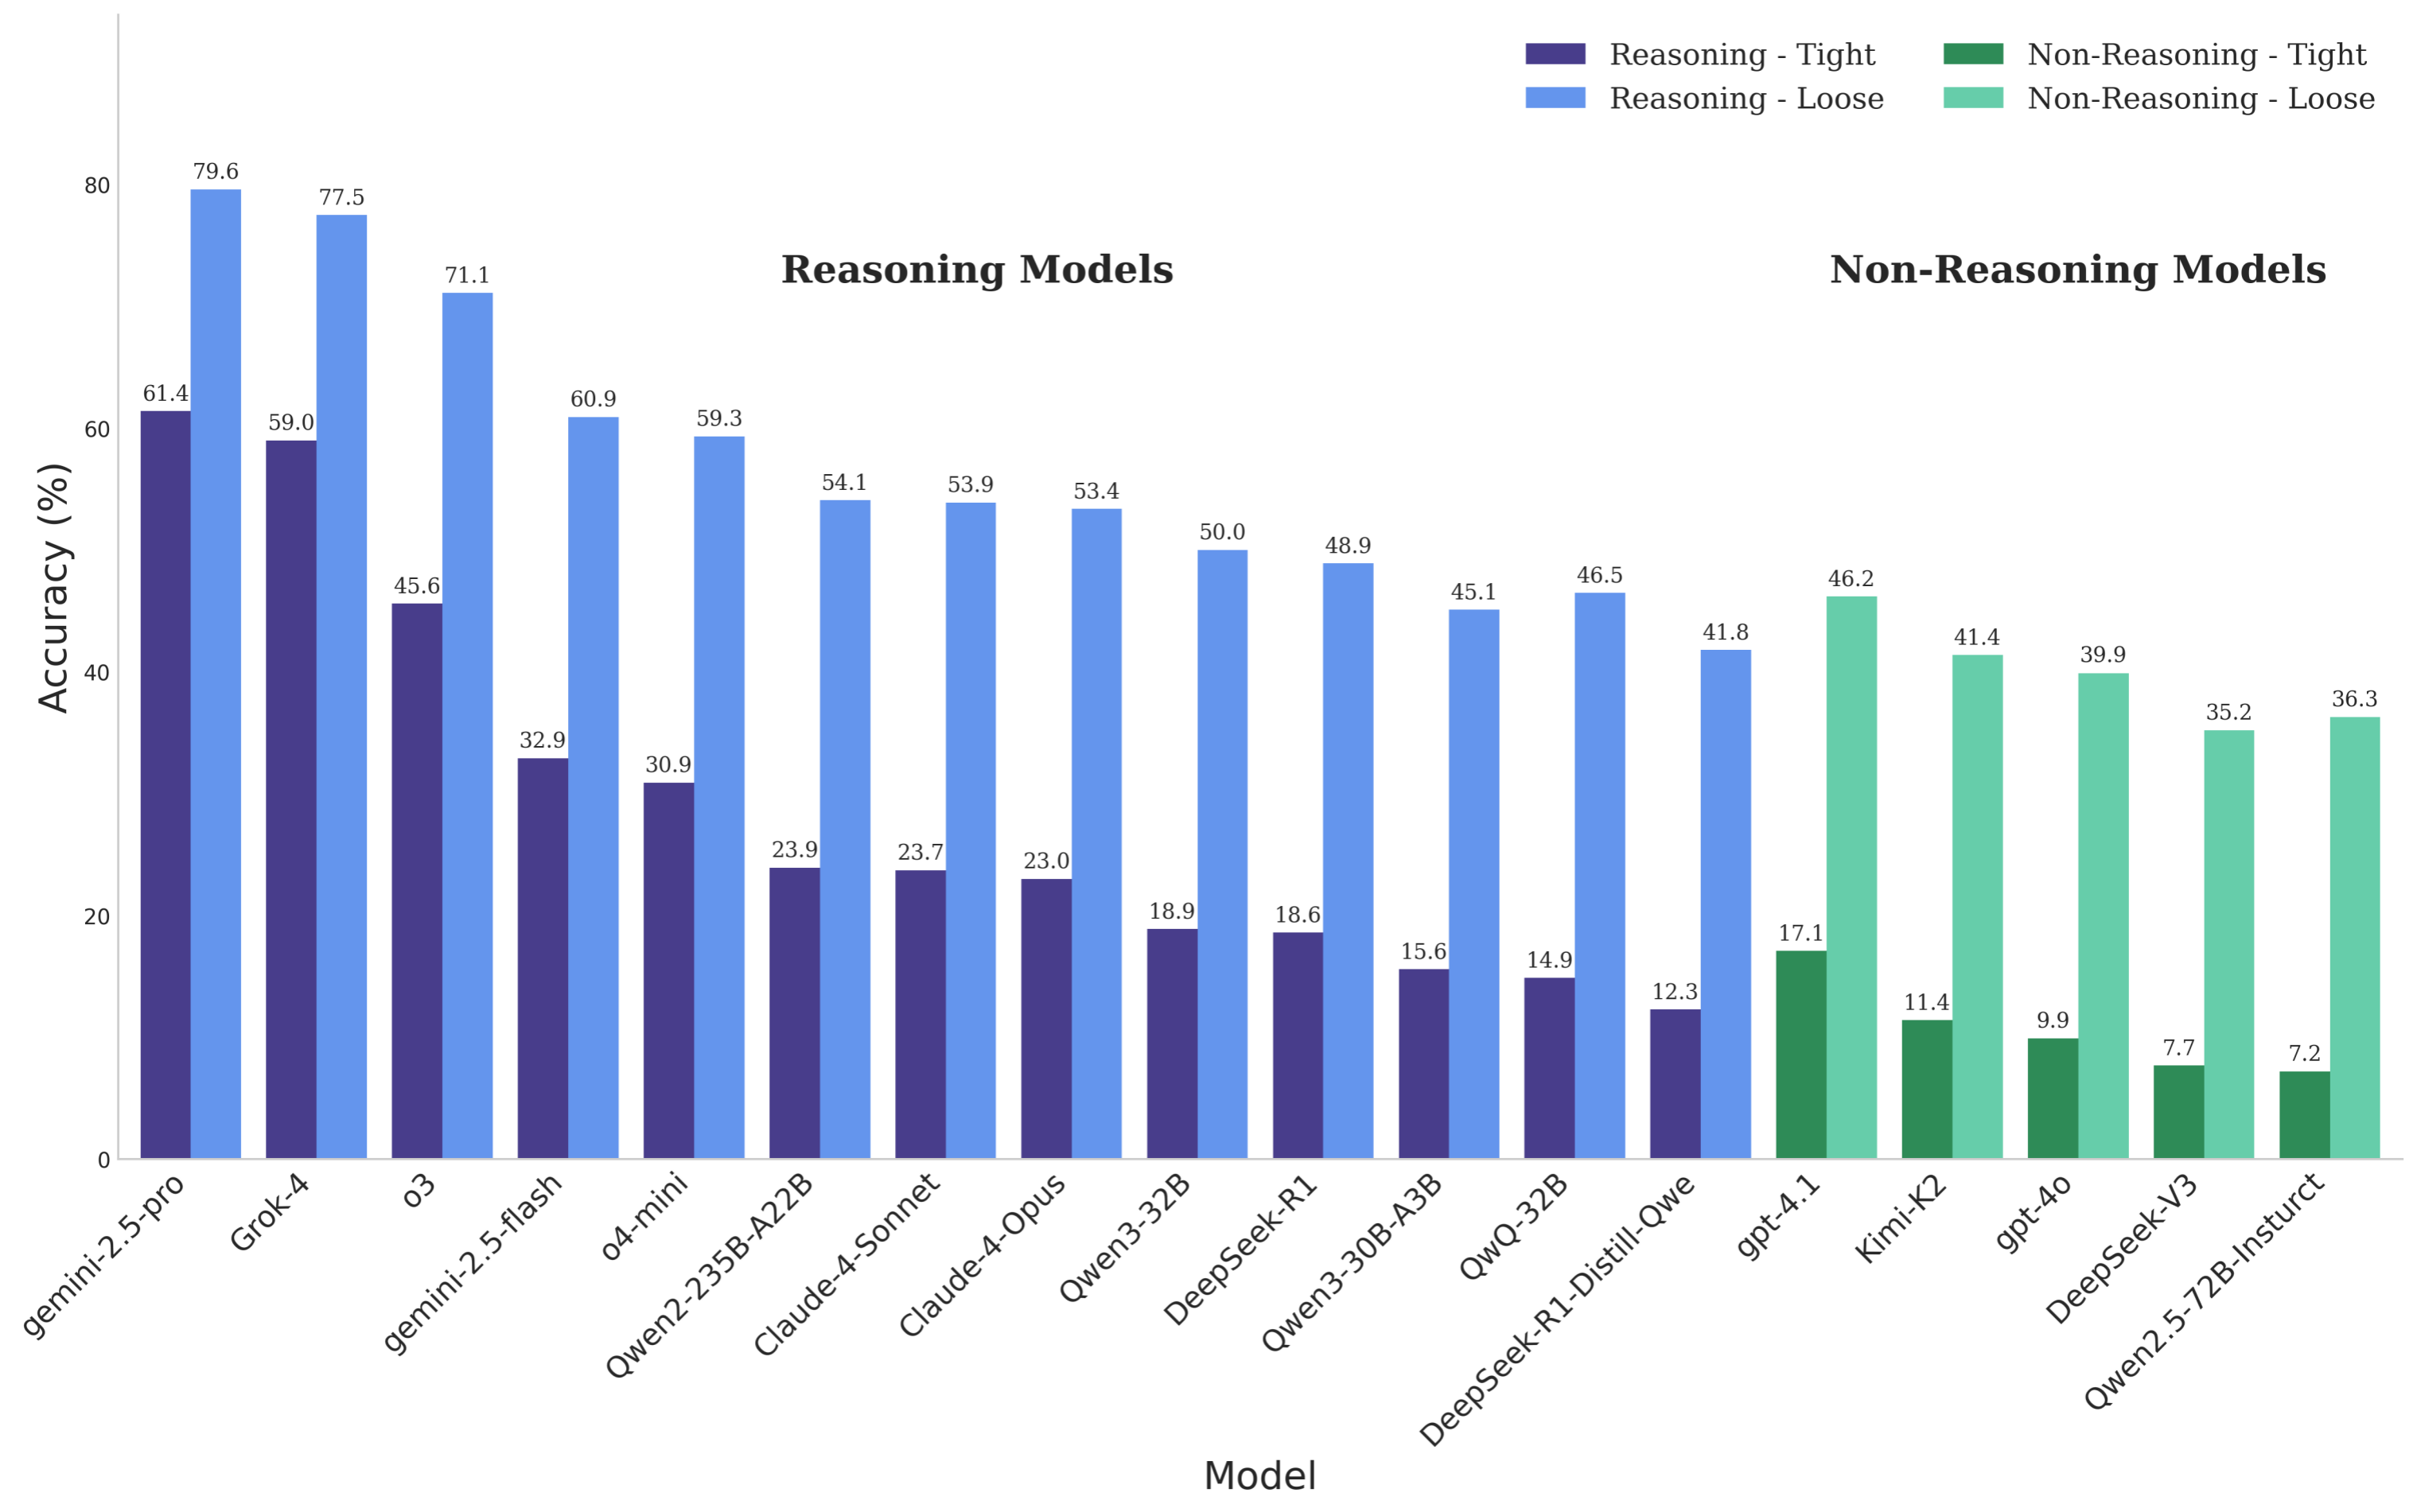

Supplement: supplementary_material [file reasoning.pdf › Code and Data of Proof2Hybrid/figures/reasoning.pdf]

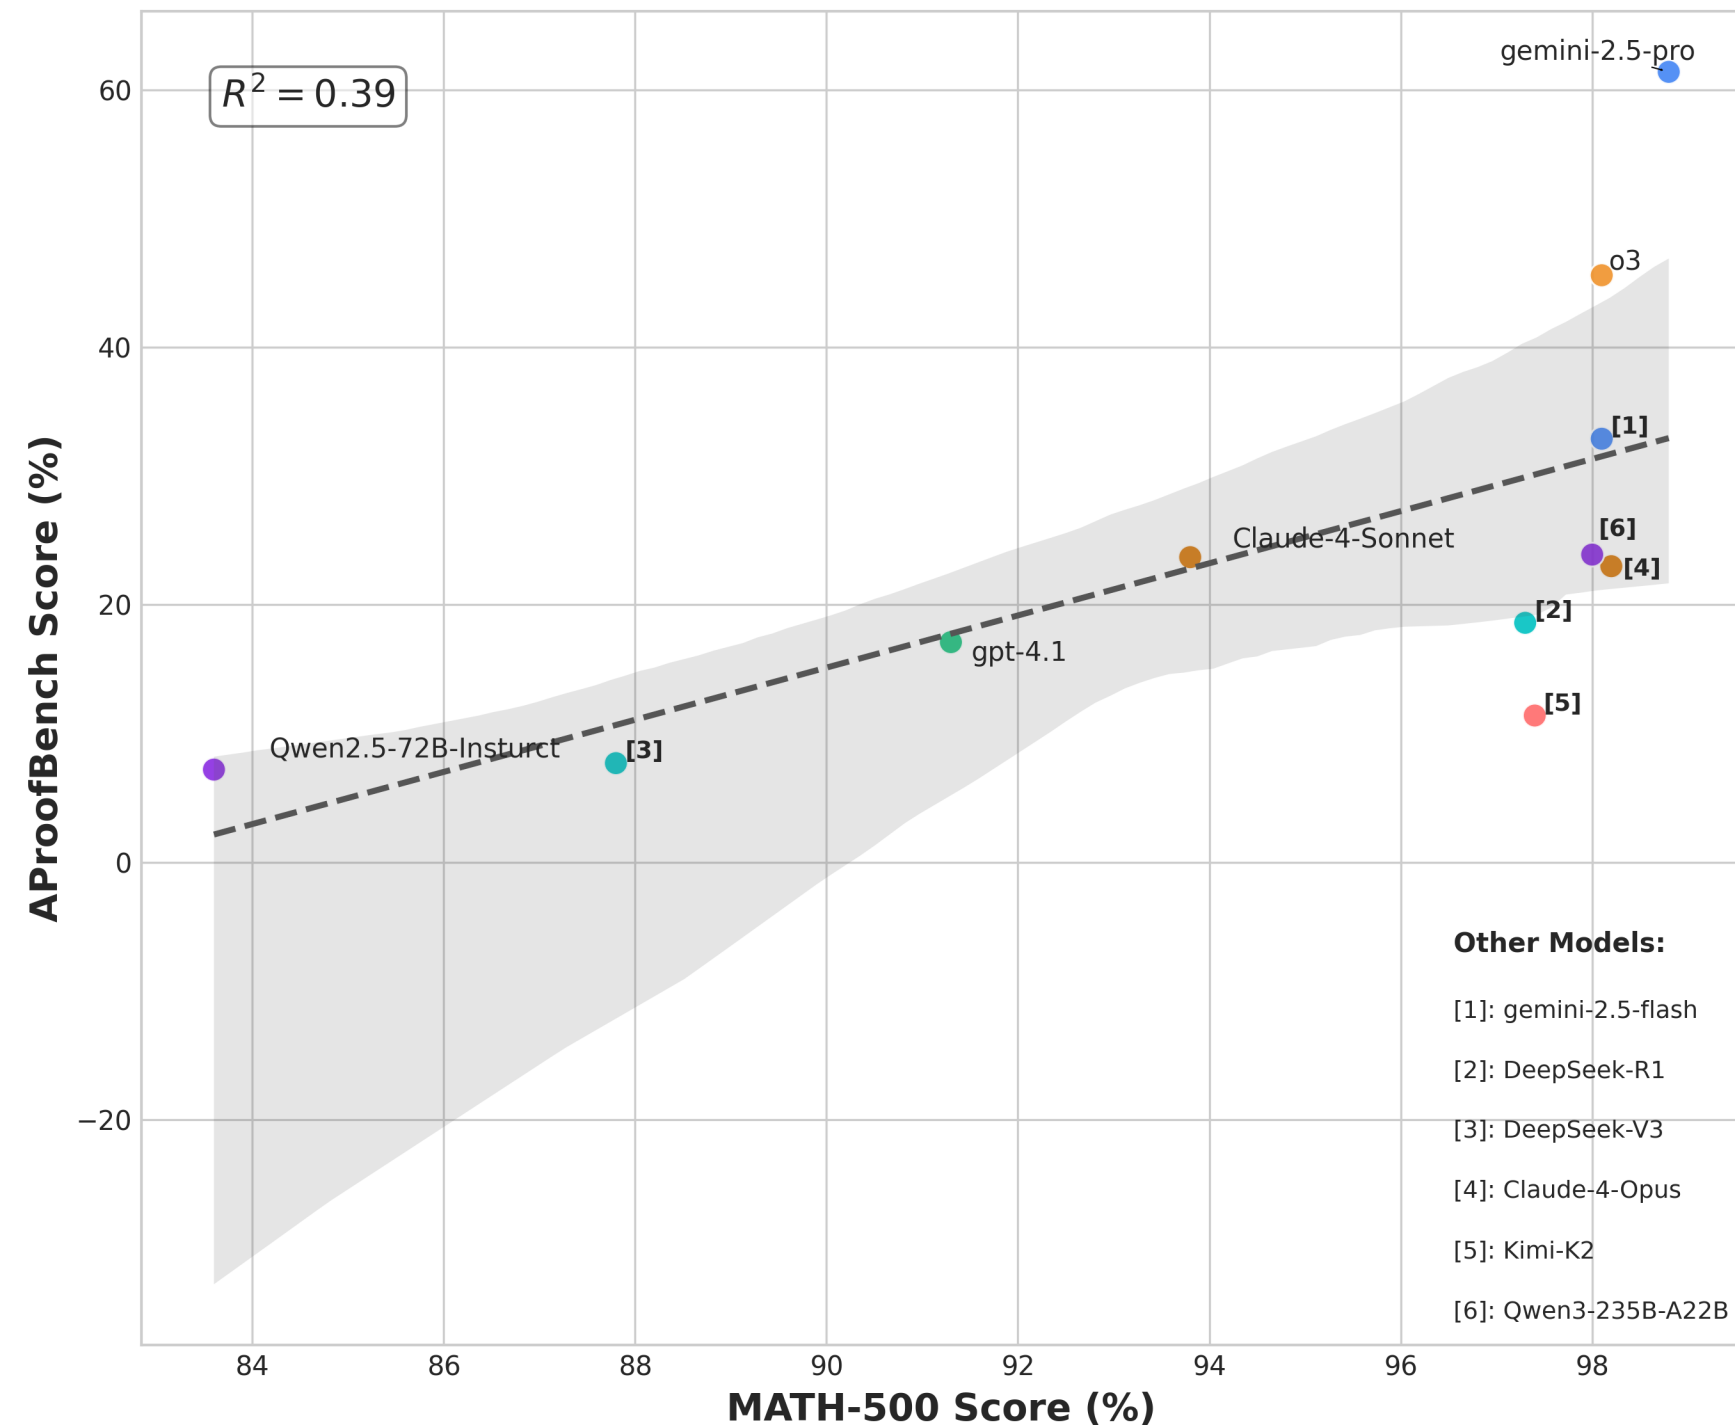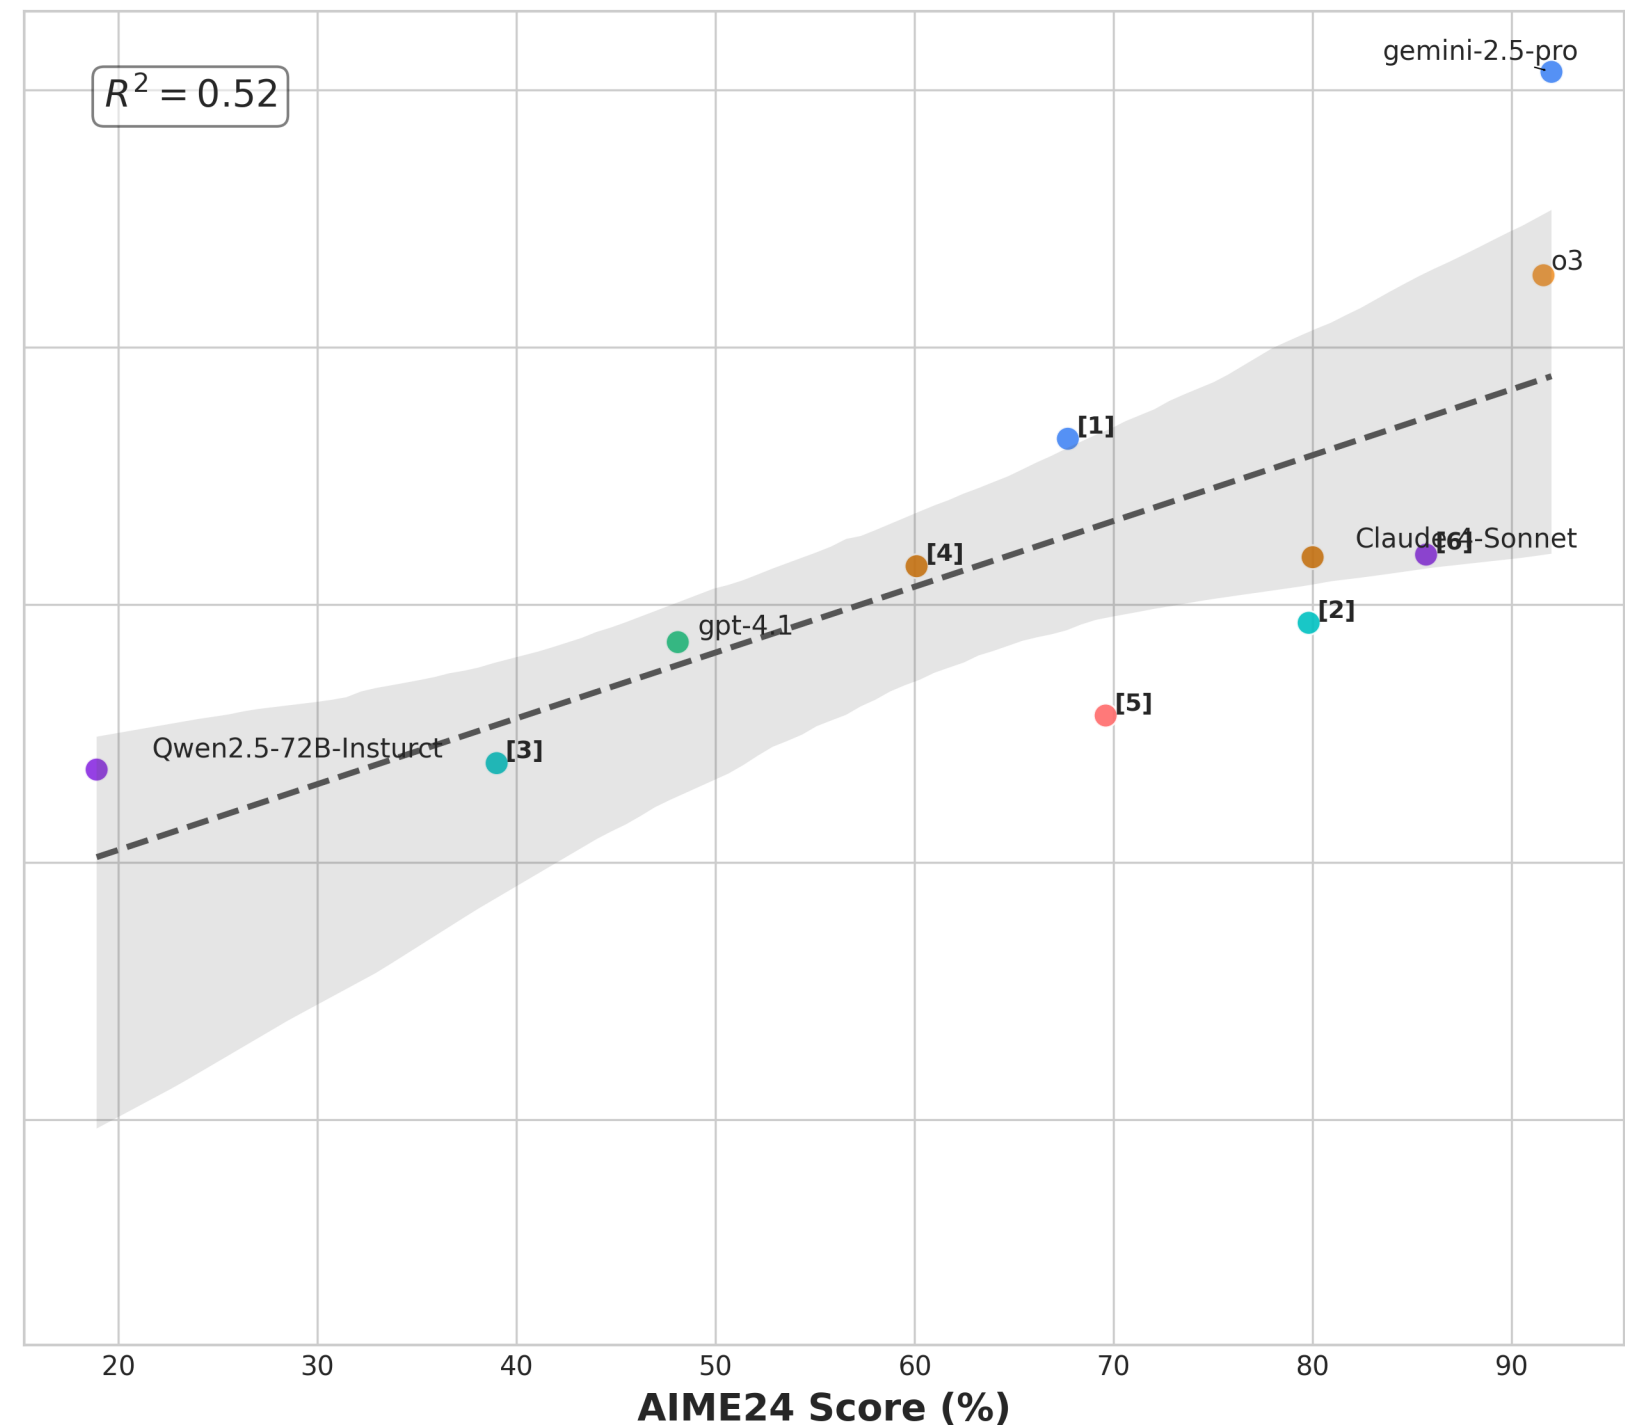

Supplement: supplementary_material [file scatter_correlation_analysis.pdf › Code and Data of Proof2Hybrid/figures/scatter_correlation_analysis.pdf]
